1 RESEARCH

2 **Trends in Nationally Notifiable Infectious Diseases in Humans and Animals**  
3 **During the COVID-19 Pandemic in South Korea**

4

5 Taehee Chang<sup>1</sup> (Orcid; 0000-0001-9224-6961), Sung-il Cho<sup>1,2</sup> (Orcid; 0000-0003-4085-1494), Dae  
6 sung Yoo<sup>3</sup> (Orcid; 0000-0002-9765-0880), Kyung-Duk Min<sup>4\*</sup> (Orcid; 0000-0002-1000-2187)

7 <sup>1</sup>Department of Public Health Sciences, Graduate School of Public Health, Seoul National University,  
8 Seoul, Republic of Korea

9 <sup>2</sup>Institute of Health and Environment, Seoul National University, Seoul, Republic of Korea

10 <sup>3</sup>College of Veterinary Medicine, Chonnam National University, Gwangju, Republic of Korea

11 <sup>4</sup>College of Veterinary Medicine, Chungbuk National University, Republic of Korea

12

13 **Abstract**

14 Non-pharmaceutical interventions (NPIs) were implemented to cope with the coronavirus  
15 disease 2019 (COVID-19) pandemic in South Korea. These interventions could also have  
16 affected other infectious diseases, but there have been no comprehensive studies regarding  
17 their impacts. This study examined trends in notifiable infectious diseases in both humans  
18 and animals during the COVID-19 pandemic. Autoregressive integrated moving average  
19 (ARIMA) models were developed for each disease using data from 2016 to 2019, and the  
20 incidences for 2020 to 2021 were predicted. Subsequently, the predicted numbers of cases  
21 were compared with actual observations. Our findings indicated a substantial reduction in  
22 human respiratory infectious diseases during implementation of NPIs. However, human  
23 gastrointestinal infectious diseases and livestock diseases did not show a significant  
24 decrease. The results revealed that the preventive effect sizes of NPIs varied among diseases  
25 and indicated the potential for side effects, suggesting that complementary interventions are  
26 needed to minimize these negative effects.

27 **Keywords:** Non-pharmaceutical intervention, COVID-19 pandemic, Infectious disease,  
28 ARIMA model

29

## 30 **1. Introduction**

31 The global coronavirus disease 2019 (COVID-19) pandemic, caused by severe acute  
32 respiratory syndrome coronavirus 2 (SARS-CoV-2), has dramatically disrupted the lives of  
33 people around the world, resulting in record numbers of both cases and fatalities [1]. In the  
34 early stages of the pandemic, the major public health measures were non-pharmaceutical  
35 interventions (NPIs) such as social distancing, mask-wearing, and contact tracing. NPIs have  
36 proven effective in mitigating the epidemic curves in various contexts, even without vaccines  
37 or specific treatments targeting the pathogen [2-4]. Since March 2020, stringent public health  
38 measures have been implemented nationwide in South Korea, effectively suppressing the  
39 spread of COVID-19 [5-7].

40 The effects of NPIs are not necessarily limited to COVID-19, and they could influence the  
41 incidences of other infectious diseases. Because the major mechanism underlying the effects  
42 of NPIs comprises reducing effective contact within the population, NPIs can also mitigate  
43 other respiratory infectious diseases [5, 8, 9]. Furthermore, with the implementation of social  
44 distancing measures (e.g., restrictions on social gatherings in restaurants) and improved  
45 personal hygiene practices, it is possible to reduce the occurrence of gastrointestinal diseases  
46 [9, 10]. The effects of COVID-19 can also extend beyond human diseases and affect the risks  
47 of infectious diseases in animals [11-13]. Human movement restrictions and the global  
48 economic crisis have significantly disrupted farming operations, veterinary services, wildlife  
49 surveillance, and zoonotic disease control, with broad impacts on animal health and welfare  
50 [11, 12]. These adverse effects can contribute to the outbreak of major zoonotic diseases,  
51 such as brucellosis and bovine tuberculosis in animal populations, increasing the risk of  
52 zoonotic spillover [13].

53 Several studies have investigated the effects of NPIs implemented during the COVID-19  
54 pandemic on other infectious diseases in South Korea. Some have shown that reductions in  
55 respiratory infection trends coincided social distancing interventions [14-20]. However, the

56 effects of NPIs on gastrointestinal diseases are inconsistent. For example, a notable reduction  
57 in viral gastrointestinal infections was reported, but there were no significant decreases in  
58 bacterial infections such as *Campylobacter* spp., *Clostridium perfringens*, and *Salmonella*  
59 spp. [10, 18, 20]. This difference presumably occurred because viral gastrointestinal diseases  
60 are primarily transmitted through fecal–oral contamination or direct contact between  
61 individuals. In contrast, bacterial gastrointestinal infections mainly occur as foodborne  
62 illnesses through the consumption of contaminated food or water [21]. Therefore, there is a  
63 need for research that can consolidate fragmented phenomena, focusing on nationally  
64 notifiable infectious diseases in humans and livestock, using data collected post-2020.

65 This study was performed to examine trends in the incidences of notifiable infectious  
66 diseases in humans and animals during the period of COVID-19-related social distancing in  
67 South Korea. We built time series models [22] for six respiratory human infectious diseases  
68 (varicella, pertussis, mumps, invasive pneumococcal disease, scarlet fever, and tuberculosis),  
69 four human gastrointestinal diseases (typhoid fever, shigellosis, hepatitis A, and  
70 enterohemorrhagic *Escherichia coli*), and two livestock diseases (cattle tuberculosis and  
71 cattle brucellosis). Considering the decreased stringency of NPIs beginning in the first half of  
72 2022 and the potential attenuation of their effects, we focused on the period from 2016 to  
73 2021 in this study.

74

## 75 **2. Methods**

### 76 **2.1 Study design**

77 This study retrospectively analyzed the impact of implementing NPIs for COVID-19 on the  
78 incidences of infectious diseases in South Korea. The criteria used to select target infectious  
79 diseases from among nationally notifiable diseases were as follows: the principal mode of  
80 transmission is respiratory (airborne or droplet) or gastrointestinal (foodborne or fecal–oral  
81 route); animal infectious diseases with a risk of zoonotic transmission were selected; and the  
82 annual average incidence was > 100 cases. The pre-intervention period was defined as  
83 January 2016 to February 2020, and the intervention period was defined as March 2020 to

84 December 2021. From May 2022 onward, the outdoor mask mandate was conditionally  
85 lifted. Thus, data up to 2021 were utilized to accurately assess the impact of NPIs.

86 We developed models utilizing an autoregressive integrated moving average (ARIMA)  
87 model to forecast incidences during the intervention period based on patterns in the pre-  
88 intervention period. The predicted values were compared with the observed values from  
89 2020 to 2021. Then, visual analysis was performed to assess whether the observed incidences  
90 were within the 95% prediction intervals of the predicted values. The reproduction number  
91 provides a better understanding of the transmission dynamics of respiratory infectious  
92 diseases [23]. Therefore, we calculated and utilized the reproduction number for respiratory  
93 infectious diseases in the time series forecasting process. Although tuberculosis is a  
94 respiratory infectious disease, we did not calculate its reproduction number because of its  
95 complex transmission routes and long latent period; instead, we utilized reported cases for  
96 time series forecasting of tuberculosis.

97 The results of previous studies regarding the impacts of COVID-19 and NPIs on other  
98 diseases suggested that the reduced burdens of target diseases during the early stages of the  
99 COVID-19 pandemic could be attributed to pandemic-related decreases in health care  
100 utilization and disease diagnoses [19]. Therefore, to adjust for the impact of health care  
101 utilization, we collected information about annual hospital visits [24] and annual health  
102 insurance claims (Table S1) [25], then used those numbers as denominators for disease  
103 incidence. In addition, to calculate the incidence rate per population, we collected annual  
104 midyear population data for each year in Korea [26]. Total annual medical expenses for each  
105 infectious disease were collected to evaluate the impacts of changes in disease occurrence  
106 after NPI implementation on the overall disease burden [27]. We calculated each year's  
107 medical expenses per case using Health Insurance Review and Assessment Service (HIRA)  
108 data from 2018 to 2021. Then, we multiplied these expenses per case by the estimated and  
109 observed cases for each disease to determine the model-based medical costs and observation-  
110 based values for each disease. We compared these values to assess changes in overall disease  
111 burden.

## 112 **2.2 Social distancing measures**

113 In February 2020, in response to the COVID-19 outbreak in China, South Korea  
114 implemented a universal mask mandate and recommended physical distancing. After the  
115 increase in COVID-19 cases in South Korea, nationwide social distancing requirements were  
116 implemented with various restrictions starting in March 2020 [28]. During the initial phase  
117 of the COVID-19 pandemic, the “Distancing in Daily Life” strategy was implemented [29].  
118 After multiple outbreaks occurred near metropolitan areas, the “Distancing in Daily Life”  
119 strategy was restructured on June 28, 2020, into a three-tier social distancing system that  
120 consisted of Levels 1, 2, and 3 (Table S2) [1]. In November 2020, the social distancing  
121 system was reorganized into a five-tier structure that consisted of Levels 1, 1.5, 2, 2.5, and 3  
122 (Table S3). Subsequently, in July 2021, the system was modified to a four-tier structure that  
123 consisted of Levels 1, 2, 3, and 4 (Table S4) [29]. In this study, the policy changes were  
124 documented based on the most current four-tier structure; any rapid changes within short  
125 periods (e.g., 1–2 weeks or 1 month) were not considered because they may not have shown  
126 sufficient effectiveness (Fig. 1).

127 **Fig. 1.** Daily number of confirmed cases and 7-day rolling average number of COVID-19  
128 cases. Levels of NPIs are based on the four-tier system implemented in July 2021.

## 129 **2.3 Data acquisition**

130 We collected data regarding weekly and monthly domestic cases of nationally notifiable  
131 infectious diseases from the Infectious Disease Portal [30] provided by the Korea Disease  
132 Control and Prevention Agency (KDCA). To minimize sampling bias and perform more  
133 robust analysis considering the COVID-19-related decrease in health care utilization, we  
134 solely focused on infectious diseases under the mandatory surveillance system. Therefore,  
135 we collected records of six respiratory infectious diseases (varicella, pertussis, mumps,  
136 invasive pneumococcal disease, scarlet fever, and tuberculosis) and four gastrointestinal  
137 diseases (typhoid fever, shigellosis, hepatitis A, and enterohemorrhagic *E. coli*) from  
138 February 2016 to December 2021 (Table S5).

139 Data were collected from the Korea Animal Health Integrated System (KAHIS) to  
140 investigate animal diseases with zoonotic potential [31]. KAHIS is a comprehensive system

141 operated by the Animal and Plant Quarantine Agency (APQA) that integrates and provides  
142 nationwide information about livestock diseases. Therefore, we selected two livestock  
143 diseases (cattle tuberculosis and cattle brucellosis) with potential zoonotic infection routes  
144 and collected disease occurrence information from January 2016 to December 2021 (Table  
145 S5). In addition, we collected data regarding the annual number of livestock and annual scale  
146 of livestock farming [32] to calculate the incidence rate relative to the livestock population.

## 147 **2.4 Reproduction number estimation**

148 The reproduction number, used for analysis of respiratory infectious diseases except  
149 tuberculosis, is expressed as shown below [23]:

$$150 \quad R_t = \frac{I_t}{\sum_{s=1}^t I_{t-s} W(s)}$$
$$151 \quad W(s) = \left[ \frac{1}{\gamma(a)\theta^a} \right] s^{a-1} e^{-\frac{s}{\theta}}$$

152 where  $R_t$  is the reproduction number,  $t$  is the number of days elapsed since the start of the  
153 epidemic,  $I_t$  is the number of cases on day  $t$ ,  $W(s)$  is the current infectivity on day  $s$  after  
154 infection,  $a$  is the shape parameter, and  $\theta$  is the scale parameter. To estimate current  
155 infectivity  $W(s)$ , we utilized the serial interval and standard deviation for each disease (Table  
156 S6) [33-35].

## 157 **2.5 Time series analysis**

158 The ARIMA (p, d, q) model is a time series forecasting technique that incorporates elements  
159 of autoregressive (AR), moving average (MA), and AR+MA models to make predictions  
160 [22]. ARIMA is commonly used to predict short-term impacts and trends of acute infectious  
161 diseases [9, 22]. The parameters p, d, and q in the ARIMA model indicate the order of  
162 autoregression, the degree of differencing applied to the original time series, and the order of  
163 moving averages, respectively. With respect to some infectious diseases that exhibit  
164 seasonality (especially respiratory diseases), we used a seasonal ARIMA (SARIMA [p, d, q]  
165 [P, D, Q] s) model. In SARIMA, the additional parameters P, D, Q, and s correspond to  
166 seasonal autoregression, seasonal integration, seasonal moving average, and seasonal period  
167 length, respectively. Time series forecasting based on the Box-Jenkins method consists of

168 four steps: identification, estimation, diagnostic checking, and forecasting [36]. We adhered  
169 to these steps when making predictions.

170 All data processing and analyses were performed using R software (v. 4.2.2) [37]. The  
171 *forecast* package [38] was used to model species niches. The corresponding R code is  
172 publicly available (<https://github.com/TaeHChang/For-the-Paper-4>).

## 173 **3. Results**

### 174 **3.1 Incidences of human respiratory diseases**

175 This study included six respiratory infectious diseases (Table S5). After the implementation  
176 of nationwide social distancing measures in March 2020 (Fig. 1), there were considerable  
177 and statistically significant decreases in the weekly reported case numbers (Table 1). The  
178 mean weekly incidences for 2016–2019 per 1 million population varied for each disease as  
179 follows: varicella, 30.11; pertussis, 0.18; mumps, 6.95; invasive pneumococcal disease, 0.21;  
180 scarlet fever, 5.57; tuberculosis, 13.13. However, after implementation of NPIs, the mean  
181 weekly incidences for 2020–2021 substantially decreased, with slight variations among  
182 phases: varicella, 12.09; pertussis, 0.05; mumps, 4.00; invasive pneumococcal disease, 0.13;  
183 scarlet fever, 0.80; tuberculosis, 9.16. The annual medical expenses related to respiratory  
184 infectious diseases decreased by 3.77% in 2020, compared with the value calculated using  
185 the average estimated incidence; the value decreased by an additional 18.91% in 2021 (Table  
186 2). Whereas medical expenses related to respiratory infectious diseases showed an overall  
187 decreasing trend, tuberculosis-related expenses showed a slight increase in 2020; scarlet  
188 fever-related expenses also exhibited a slight increase in 2021.

189 ARIMA models were constructed; the parameters, diagnostic plots, and model  
190 characteristics are presented in the Supplementary materials (Table S7–13, Fig. S1–12).  
191 Except for tuberculosis, the actual incidences of diseases examined during the intervention  
192 period were significantly lower than the predicted incidences (Fig. 2A–J). The incidences of  
193 tuberculosis were lower than predicted values but fell within the 95% prediction intervals of  
194 the predicted values. Though they showed a significant decrease compared with the predicted  
195 values after implementation of social distancing measures, but no significant difference was  
196 observed from the second half of 2020 (Fig. 2K, L).

197

198 **Table 1.** Weekly Average Incidences of Notifiable Infectious Diseases Included in the Study

| <b>Human Diseases<br/>(per million population)</b>   | 2016-<br>2019 | 2020-<br>2021 | Phase 1 <sup>*</sup> | Phase 2 <sup>†</sup> | Phase 3 <sup>‡</sup> | Phase<br>4 <sup>§</sup> | Phase 5 <sup>¶</sup> |
|------------------------------------------------------|---------------|---------------|----------------------|----------------------|----------------------|-------------------------|----------------------|
| <b>Respiratory diseases</b>                          |               |               |                      |                      |                      |                         |                      |
| Varicella                                            | 30.11         | 12.09         | 25.76                | 9.29                 | 9.31                 | 8.27                    | 7.81                 |
| Pertussis                                            | 0.18          | 0.05          | 0.17                 | 0.03                 | 0.01                 | 0.01                    | 0.01                 |
| Mumps                                                | 6.95          | 4.00          | 3.89                 | 4.28                 | 4.34                 | 3.29                    | 4.21                 |
| Invasive<br>pneumococcal disease                     | 0.21          | 0.13          | 0.28                 | 0.11                 | 0.08                 | 0.1                     | 0.1                  |
| Scarlet fever                                        | 5.57          | 0.80          | 2.12                 | 0.76                 | 0.59                 | 0.34                    | 0.21                 |
| Tuberculosis                                         | 13.13         | 9.16          | 10.02                | 9.17                 | 9.31                 | 8.94                    | 8.34                 |
| <b>Gastrointestinal or<br/>enteroviral diseases</b>  |               |               |                      |                      |                      |                         |                      |
| Typhoid                                              | 0.04          | 0.03          | 0.03                 | 0.05                 | 0.04                 | 0.02                    | 0.03                 |
| Shigellosis                                          | 0.02          | 0.02          | 0.03                 | 0.04                 | 0.01                 | 0.01                    | 0.01                 |
| Hepatitis A                                          | 3.02          | 1.91          | 1.37                 | 1.58                 | 1.59                 | 2.48                    | 2.53                 |
| Enterohemorrhagic <i>E. coli</i><br>infections       | 0.05          | 0.12          | 0.04                 | 0.23                 | 0.21                 | 0.06                    | 0.06                 |
| <b>Veterinary diseases<br/>(per 100,000 numbers)</b> |               |               |                      |                      |                      |                         |                      |
| Bovine Tuberculosis                                  | 2.19          | 1.29          | 1.04                 | 1.82                 | 1.43                 | 1.27                    | 0.91                 |
| Bovine Brucellosis                                   | 0.49          | 0.61          | 0.41                 | 0.51                 | 0.55                 | 0.83                    | 0.74                 |

199 <sup>\*</sup>20 Feb 2020 ~ 21 Mar 2020

200 <sup>†</sup>22 Mar 2020 ~ 27 Jun 2020

201 <sup>‡</sup>28 Jun 2020 ~ 22 Aug 2020

202 <sup>§</sup>23 Aug 2020 ~ 26 Jul 2021

203 <sup>¶</sup>27 Jul 2021 ~ 31 Dec 2021

204

205

206



|                             | 2018 | 2019 | 2020<br>lower 95 % | 2020<br>average | 2020<br>upper 95 % | 2020<br>observed (%) <sup>*</sup> | 2021<br>lower 95 % | 2021<br>average | 2021<br>upper 95 % | 2021<br>observed (%) <sup>†</sup> |
|-----------------------------|------|------|--------------------|-----------------|--------------------|-----------------------------------|--------------------|-----------------|--------------------|-----------------------------------|
| <b>Respiratory diseases</b> |      |      |                    |                 |                    |                                   |                    |                 |                    |                                   |

**Table 2.** Annual medical expenses due to infectious diseases (the unit is one million USD).

|                                            |               |                |               |               |                |                       |               |               |                |                        |
|--------------------------------------------|---------------|----------------|---------------|---------------|----------------|-----------------------|---------------|---------------|----------------|------------------------|
| Varicella                                  | 5,399         | 5,590          | 3,704         | 7,153         | 13,548         | 2,675 (-62.61)        | 2,692         | 6,559         | 16,001         | 1,971 (-69.95)         |
| Pertussis                                  | 544           | 298            | 44            | 380           | 1,171          | 42 (-88.98)           | 13            | 409           | 1,900          | 6 (-98.65)             |
| Mumps                                      | 1,283         | 1,445          | 1,203         | 1,552         | 2,189          | 790 (-49.08)          | 1,066         | 1,532         | 2,203          | 775 (-49.42)           |
| Invasive pneumococcal disease              | 1,988         | 1,686          | 1,305         | 2,920         | 6,437          | 1,360 (-53.41)        | 1,305         | 3,370         | 8,717          | 1,116 (-66.87)         |
| Scarlet fever                              | 1,283         | 691            | 182           | 465           | 947            | 317 (-31.80)          | 28            | 124           | 567            | 154 (24.27)            |
| Tuberculosis                               | 61,241        | 63,535         | 42,695        | 48,705        | 55,593         | 53,681 (10.21)        | 48,536        | 59,956        | 74,117         | 54,324 (-9.39)         |
| <b>Subtotal</b>                            | <b>71,738</b> | <b>73,244</b>  | <b>49,134</b> | <b>61,174</b> | <b>79,886</b>  | <b>58,864 (-3.77)</b> | <b>53,640</b> | <b>71,951</b> | <b>103,505</b> | <b>58,345 (-18.91)</b> |
| <b>Gastrointestinal diseases</b>           |               |                |               |               |                |                       |               |               |                |                        |
| Typhoid                                    | 153           | 41             | 6             | 17            | 62             | 27 (89.81)            | 5             | 22            | 102            | 41 (90.625)            |
| Shigellosis                                | 36            | 49             | 6             | 22            | 40             | 12 (-46.86)           | 3             | 21            | 126            | 15 (-28.06)            |
| Hepatitis A                                | 2,248         | 27,297         | 1,477         | 6,193         | 22,857         | 4,820 (-22.17)        | 1,466         | 9,407         | 60,328         | 9,769 (3.85)           |
| Enterohemorrhagic <i>E.coli</i> infections | 120           | 157            | 94            | 176           | 275            | 364 (106.61)          | 86            | 184           | 388            | 244 (33.06)            |
| <b>Subtotal</b>                            | <b>2,557</b>  | <b>27,544</b>  | <b>1,583</b>  | <b>6,408</b>  | <b>23,234</b>  | <b>5,223 (-18.49)</b> | <b>1,560</b>  | <b>9,633</b>  | <b>60,945</b>  | <b>10,070 (4.53)</b>   |
| <b>Total</b>                               | <b>74,295</b> | <b>100,788</b> | <b>50,717</b> | <b>67,582</b> | <b>103,120</b> | <b>64,087 (-5.17)</b> | <b>55,201</b> | <b>81,584</b> | <b>164,450</b> | <b>68,415 (-16.14)</b> |

<sup>a</sup>The change from the average estimates of the year 2020

<sup>†</sup>The change from the average estimates of the year 2021

**Fig. 2.** A, C, E, G, I, Weekly incidences of respiratory infectious diseases from the national surveillance system for notifiable infectious diseases, South Korea, 2016–2019 vs. 2020–2021. B, D, F, H, J, Observed and predicted weekly incidences from 2016 to 2021. K, Monthly incidences of tuberculosis. L, Observed and predicted weekly incidences of tuberculosis.

### 3.2 Incidences of human gastrointestinal diseases

This study included four gastrointestinal infectious diseases (Table S5). Unlike respiratory infectious diseases, the incidences of gastrointestinal diseases did not show significant decreases after implementation of NPIs (Table 1). The mean weekly incidences for 2016–2019 per 1 million population varied among diseases: typhoid, 0.04; shigellosis, 0.02; hepatitis A, 3.02; enterohemorrhagic *E. coli* infection, 0.05. Although there were slight variations among phases, the mean weekly incidences for 2020–2021 after the implementation of social distancing measures were as follows: typhoid, 0.03; shigellosis, 0.02; hepatitis A, 1.91; enterohemorrhagic *E. coli* infection, 0.12. The annual medical expenses related to gastrointestinal infectious diseases decreased by 18.49% in 2020, compared with the value calculated using the average estimated incidence; the value increased by 4.53% in 2021 (Table 2). The trend in medical expenses related to gastrointestinal infectious diseases varied according to specific conditions, such that different directions were observed for each disease.

ARIMA models were constructed; the parameters, diagnostic plots, and model characteristics are presented in the Supplementary materials (Table S14–17, Fig. S13–20). The observed incidences of gastrointestinal diseases mostly overlapped with the 95% prediction intervals of the predicted values (Fig. 3). In addition, unexpected outbreaks of typhoid and enterohemorrhagic *E. coli* infection occurred, resulting in higher observed incidences than expected (Fig. 3A, B, G, H).

**Fig. 3.** A, C, E, G, Monthly incidences of gastrointestinal infectious diseases from the national surveillance system for notifiable infectious diseases, South Korea, 2016–2019 vs. 2020–2021. B, D, F, H, Observed and predicted monthly incidences from 2016 to 2021.

### 3.3 Incidence of zoonotic diseases in animals

This study included two zoonotic infectious diseases in livestock (Table S5). Comparison of the periods before and after implementation of NPIs showed contrasting patterns in bovine tuberculosis and bovine brucellosis (Table 1). The mean weekly incidences for 2016–2019 per 100,000 cattle varied between diseases: bovine tuberculosis, 2.19; bovine brucellosis, 0.49. Although slight variations were observed among phases, the mean weekly incidences for 2020–2021 after implementation of social distancing measures were as follows: bovine tuberculosis, 1.29; bovine brucellosis, 0.61.

ARIMA models were established; the parameters, diagnostic plots, and model characteristics are presented in the Supplementary materials (Table S18–19, Fig. S21–24). The incidences of bovine tuberculosis were significantly lower than expected from the end of 2020 (Fig. 4A, B). In contrast, the incidence of bovine brucellosis rapidly increased and reached record high case numbers from March 2021 (Fig. 4C, D).

**Fig. 4.** A, C, Monthly incidences of zoonotic infectious diseases in livestock from the national surveillance system, South Korea, 2016–2019 vs. 2020–2021. B, D, Observed and predicted monthly incidences from 2016 to 2021.

## 4. Discussion

The present study utilized national surveillance data regarding notifiable infectious diseases in South Korea from 2016 to 2021 to examine how NPI implementation to control the COVID-19 pandemic affected the patterns of various contagious diseases. We used data from 2016 to 2019 to develop a reliable time series model, then predicted the incidences of communicable diseases for 2020 and 2021 under the assumption that NPIs had not been implemented. By comparing model-predicted values with observed values, we found that the incidence of respiratory infectious diseases significantly decreased after implementation of NPIs. However, there were no significant differences in the occurrence trends of gastrointestinal infectious diseases and livestock diseases between according to NPI implementation. The overall medical expenses from infectious diseases other than COVID-19 decreased by 5.17% in 2020 and 16.14% in 2021, compared with the predicted values

(Table 2). The findings provide valuable insights for the implementation of appropriate control measures during future epidemics.

The significant reductions and continuously low incidences of respiratory infectious diseases in South Korea during the COVID-19 pandemic can mainly be attributed to the extensive adoption of NPIs. Regardless of whether the infectious agent is a bacterium (pertussis, scarlet fever, invasive pneumococcal diseases, and tuberculosis) or a virus (varicella and mumps), respiratory infectious diseases transmitted via droplets, fomites, or direct contact generally exhibited a lower incidence after implementation of NPIs; most of these trends persisted until the end of 2021. The sharp decline in respiratory infectious disease incidence after implementation of NPIs was consistent with the findings of previous studies in South Korea regarding the occurrence trends of respiratory infectious diseases [5, 15-17, 39, 40] and the findings of studies focused on respiratory infectious disease patterns in other countries, such as China and the United States [9, 41-43]. After implementation of NPIs, the number of mumps cases remained lower than predicted. However, beginning in October 2021, the number of cases increased above the expected value. This could be attributed to the nationwide relaxation of school attendance criteria in the fall semester of 2021, which led to more outbreaks in schools. Mumps is commonly observed among adolescents aged 13–18 years, and it frequently spreads in settings where people engage in group activities (e.g., schools) [44]. Therefore, precautions are needed to prevent its resurgence after the cessation of NPIs.

Tuberculosis showed a slightly different pattern compared with other respiratory infectious diseases. In the early stages of NPI implementation, the number of cases significantly decreased. However, from the second half of 2020, there was little to no difference between the observed values and the predicted values. Reductions in tuberculosis notifications in early 2020 because of complex factors affecting disease diagnosis have been reported in several countries, including South Korea [19, 45]. However, the impact of NPIs known to prevent acute infections has been limited in suppressing the number of tuberculosis cases in the medium to long term in South Korea, as a significant portion of tuberculosis cases in the country is presumed to result from latent tuberculosis infection progressing to active disease [19, 46]. Thus, there is a need to incorporate the existing strategy of focusing on prophylactic

treatment to prevent new infections, as well as the strategy of effectively preventing active tuberculosis onset by treating latent infections.

The incidences of gastrointestinal diseases did not significantly decrease after the implementation of NPIs. Studies using data from countries such as China [9] and the United States [47] showed significant decreases in most gastrointestinal infectious diseases after NPI implementation. Although the dissimilar contexts hinder direct comparisons, differences in the extent of NPI implementation and accessibility to medical services could explain the discrepancies. In the early stages of the COVID-19 pandemic, China and the United States implemented strict social distancing measures and emphasized stay-at-home orders. In contrast, South Korea implemented less strict policies that focused on personal hygiene measures. Therefore, the effectiveness of NPIs in controlling infectious diseases may have varied among countries, and the decrease in health care facility utilization may have been smaller in South Korea [18, 19, 47]. In addition, the gastrointestinal diseases included in this study are primarily classified as foodborne diseases that occur via consumption of contaminated food or water [20]. Therefore, the occurrence of foodborne diseases included in this study might not have been significantly affected by personal hygiene enhancement and social distancing measures.

This study revealed inconsistent temporal trends between the two target zoonotic diseases in industrial animals: bovine tuberculosis and brucellosis. The increased incidence of brucellosis was consistent with prior predictions. Social distancing is likely to hinder proper veterinary care and restrict logistical activity necessary for livestock management [11]. Moreover, in South Korea, the number of cattle farms increased during social distancing, possibly because of the increased cost of beef [48]. The sudden increases in disease incidence may indicate an increased number of inexperienced owners, which would impact management quality. Because the primary route of brucellosis transmission is the movement of infected cattle [49], inexperienced owners may require greater screening skills. In contrast, the decreased incidence of bovine tuberculosis differed from our expectations. One possible explanation is that there was an increased level of bovine tuberculosis surveillance in South Korea. The number of cattle screened for bovine tuberculosis infection has increased since 2017, and the corresponding budget has also increased (Table S20) [50]. Because early

detection by effective surveillance plays a key role in controlling chronic diseases with a long latent period, the decreased incidence may be explained by effective surveillance efforts.

This study has several limitations. First, the occurrences of infectious diseases are influenced by various factors, including population immunity, seasonal changes, climatic factors, and human mobility patterns. Thus, it is challenging to make causal inferences regarding the effects of social distancing measures and changes in disease patterns. Therefore, we can only interpret and analyze potential influencing factors. Second, the observed decreases in certain infectious disease incidences may not solely reflect actual reductions in incidence rates. They could also be influenced by other pandemic-related factors including health care utilization. Therefore, we utilized annual hospital visits and health insurance claims to adjust for these changes in health care utilization. However, it is possible that biases persisted with respect to altered health care-seeking behaviors and surveillance capacity. Third, although ARIMA is a well-established and practical technology for infectious disease forecasting [22, 43], it has limitations with respect to distinguishing among transmission factors, such as genetic strains and latent infections. In addition, ARIMA may not be the most appropriate method for long-term predictions, which reduces our confidence in longer-term predictions. Fourth, this study did not consider demographic information, such as age and sex.

## 5. Conclusion

We examined the impacts of COVID-19 and COVID-19-related NPIs on notifiable infectious diseases with diverse transmission pathways throughout the duration of NPI implementation in South Korea. The implementation of NPIs significantly reduced the incidences of infectious diseases transmitted via respiratory routes or direct person-to-person contact; this trend continued until late 2021. Although it is difficult to identify a single factor responsible for changes in the incidences of infectious diseases, the concurrent implementation of NPIs at various levels (individual, community, environmental, and national), along with behavioral changes, likely played a key role in reducing community transmission and alleviating the

associated health care burden. Therefore, these comprehensive NPI strategies are important public health considerations for infectious disease control and future pandemic preparedness.

## **Acknowledgements**

This research was supported by the Bio & Medical Technology Development Program of the National Research Foundation, funded by the Korean government (No.

2021M3E5E3081366). However, the funders had no role in the design and conduct of the study; collection, management, analysis, and interpretation of the data; preparation, review, or approval of the paper; or the decision to submit the article for publication.

## **CRedit authorship contribution statement**

**Taehee Chang:** conceptualization (equal), data curation (lead), formal analysis (lead), funding acquisition (supporting), methodology (equal), visualization (lead) writing – original draft (lead), writing – reviewing and editing (lead); **Sung-il Cho:** conceptualization (supporting), formal analysis (supporting), funding acquisition (supporting), methodology (equal), project administration (equal), writing – reviewing and editing (equal); **Dae sung Yoo:** conceptualization (supporting), formal analysis (supporting), funding acquisition (supporting), methodology (equal), project administration (equal), writing – reviewing and editing (equal); **Kyung-Duk Min:** conceptualization (equal), formal analysis (supporting), funding acquisition (lead), methodology (equal), project administration (equal), visualization (supporting), writing – reviewing and editing (equal)

## **Declaration of Competing Interest**

The authors declare that they have no known competing financial interests or personal relationships that could have appeared to influence the work reported in this paper.

## **Appendix A. Supplementary material**



## References

- [1] Wang H, Paulson KR, Pease SA, Watson S, Comfort H, Zheng P, et al. Estimating excess mortality due to the COVID-19 pandemic: a systematic analysis of COVID-19-related mortality, 2020-21. *The Lancet*. 2022;399(10334):1513-36. doi: 10.1016/S0140-6736(21)02796-3.
- [2] Bielecki M, Züst R, Siegrist D, Meyerhofer D, Cramer GAG, Stanga Z, et al. Social Distancing Alters the Clinical Course of COVID-19 in Young Adults: A Comparative Cohort Study. *Clinical Infectious Diseases*. 2020;72(4):598-603. doi: 10.1093/cid/ciaa889.
- [3] Giles ML, Wallace EM, Alpren C, Brady N, Crouch S, Romanes F, et al. Suppression of Severe Acute Respiratory Syndrome Coronavirus 2 (SARS-CoV-2) After a Second Wave in Victoria, Australia. *Clinical Infectious Diseases*. 2020;73(3):e808-e10. doi: 10.1093/cid/ciaa1882.
- [4] Tsai AC, Harling G, Reynolds Z, Gilbert RF, Siedner MJ. Coronavirus Disease 2019 (COVID-19) Transmission in the United States Before Versus After Relaxation of Statewide Social Distancing Measures. *Clinical Infectious Diseases*. 2020;73(Supplement\_2):S120-S6. doi: 10.1093/cid/ciaa1502
- [5] Ahn JG. Epidemiological changes in infectious diseases during the coronavirus disease 2019 pandemic in Korea: a systematic review. *Clin Exp Pediatr*. 2022;65(4):167-71. doi: 10.3345/cep.2021.01515.
- [6] Min KD, Kang H, Lee JY, Jeon S, Cho S. Estimating the Effectiveness of Non-Pharmaceutical Interventions on COVID-19 Control in Korea. *J Korean Med Sci*. 2020;35(35)(1598-6357 (Electronic)). doi: 10.3346/jkms.2020.35.e321.
- [7] Choi JH. Effects of nonpharmaceutical interventions for coronavirus disease 2019. *Clin Exp Pediatr*. 2022;65(5):250-1. doi: 10.3345/cep.2021.01830.
- [8] Chow EJ, Uyeki TM, Chu HY. The effects of the COVID-19 pandemic on community respiratory virus activity. *Nature Reviews Microbiology*. 2023;21(3):195-210. doi: 10.1038/s41579-022-00807-9
- [9] Geng MJ, Zhang HY, Yu LJ, Lv CL, Wang T, Che TL, et al. Changes in notifiable infectious disease incidence in China during the COVID-19 pandemic. *Nature Communications*. 2021;12(1):6923. doi: 10.1038/s41467-021-27292-7.
- [10] Ahn SY, Park JY, Lim IS, Chae SA, Yun SW, Lee NM, et al. Changes in the Occurrence of Gastrointestinal Infections after COVID-19 in Korea. *J Korean Med Sci*. 2021;36(24). doi: 10.3346/jkms.2021.36.e180.
- [11] Rahman MT, Islam MS, Shehata AA, Basiouni S, Hafez HM, Azhar EI, et al. Influence of COVID-19 on the sustainability of livestock performance and welfare on a global scale. *Tropical Animal Health and Production*. 2022;54(5):309. doi: 10.1007/s11250-022-03256-x.
- [12] Hashem NM, González-Bulnes A, Rodríguez-Morales AJ. Animal Welfare and Livestock Supply Chain Sustainability Under the COVID-19 Outbreak: An Overview. *Frontiers in Veterinary Science*. 2020;7. doi: 10.3389/fvets.2020.582528.
- [13] Raihan A, Himu HA. Global impact of COVID-19 on the sustainability of livestock production. *Global Sustainability Research*. 2023;2(2):1-11. doi: 10.56556/gssr.v2i2.447.

- [14] Huh K, Kim YE, Ji W, Kim DW, Lee EJ, Kim JH, et al. Decrease in hospital admissions for respiratory diseases during the COVID-19 pandemic: a nationwide claims study. *Thorax*. 2021;76(9):939. doi: 10.1136/thoraxjnl-2020-216526.
- [15] Kim JH, Roh YH, Ahn JG, Kim MY, Huh K, Jung J, et al. Respiratory syncytial virus and influenza epidemics disappearance in Korea during the 2020-2021 season of COVID-19. *Int J Infect Dis*. 2021(1878-3511 (Electronic)). doi: 10.1016/j.ijid.2021.07.005.
- [16] Lee H, Lee H, Song K-H, Kim ES, Park JS, Jung J, et al. Impact of Public Health Interventions on Seasonal Influenza Activity During the COVID-19 Outbreak in Korea. *Clinical Infectious Diseases*. 2020;73(1):e132-e40. doi: 10.1093/cid/ciaa672.
- [17] Park S, Michelow IC, Choe YJ. Shifting Patterns of Respiratory Virus Activity Following Social Distancing Measures for Coronavirus Disease 2019 in South Korea. *The Journal of Infectious Diseases*. 2021;224(11):1900-6. doi: 10.1093/infdis/jiab231.
- [18] Yun HE, Ryu BY, Choe YJ. Impact of social distancing on incidence of vaccine-preventable diseases, South Korea. *Journal of Medical Virology*. 2021;93(3):1814-6. doi: 10.1002/jmv.26614.
- [19] Kwak N, Hwang S-S, Yim J-J. Effect of COVID-19 on Tuberculosis Notification, South Korea. *Emerging Infectious Disease journal*. 2020;26(10):2506. doi: 10.3201/eid2610.202782.
- [20] Park S, Michelow IC, Choe YJ. Trend of Gastrointestinal Infections Following Nonpharmaceutical Interventions, South Korea, 2020. *The Journal of Infectious Diseases*. 2021;224(2):368-71. doi: 10.1093/infdis/jiab244.
- [21] Scallan E, Mahon BE, Hoekstra RM, Griffin PM. Estimates of Illnesses, Hospitalizations and Deaths Caused by Major Bacterial Enteric Pathogens in Young Children in the United States. *The Pediatric Infectious Disease Journal*. 2013;32(3):217-21. doi: 10.1097/INF.0b013e31827ca763.
- [22] Benvenuto D, Giovanetti M, Vassallo L, Angeletti S, Ciccozzi M. Application of the ARIMA model on the COVID-2019 epidemic dataset. *Data in Brief*. 2020;29:105340. doi: 10.1016/j.dib.2020.105340.
- [23] Cori A, Ferguson NM, Fraser C, Cauchemez S. A New Framework and Software to Estimate Time-Varying Reproduction Numbers During Epidemics. *American Journal of Epidemiology*. 2013;178(9):1505-12. doi: 10.1093/aje/kwt133.
- [24] [dataset] National Health Insurance Service. Status of medical treatment by region 2006-2021. 2022. (accessed at Jan 2023). Available from: [https://kosis.kr/statHtml/statHtml.do?orgId=350&tblId=TX\\_35003\\_A004&vw\\_cd=MT\\_ZTITLE&list\\_id=350\\_35003\\_1&scrId=&seqNo=&lang\\_mode=ko&obj\\_var\\_id=&itm\\_id=&conn\\_path=MT\\_ZTITLE&path=%252FstatisticsList%252FstatisticsListIndex.do](https://kosis.kr/statHtml/statHtml.do?orgId=350&tblId=TX_35003_A004&vw_cd=MT_ZTITLE&list_id=350_35003_1&scrId=&seqNo=&lang_mode=ko&obj_var_id=&itm_id=&conn_path=MT_ZTITLE&path=%252FstatisticsList%252FstatisticsListIndex.do)
- [25] [dataset] Health Insurance Review and Assessment Service. Total Medical Expenses Status. 2023. (accessed at Jan 2023). Available from: <http://opendata.hira.or.kr/op/opc/olapHthInsRvStatInfo.do>
- [26] [dataset] Korea Statistics. Total population of South Korea. 2023. (accessed at Jan 2023). Available from: <http://kosis.kr/visual/populationKorea/PopulationDashBoardDetail.do>
- [27] [dataset] Health Insurance Review and Assessment Service. Infectious Disease Treatment Expenses Statistics. 2023. (accessed at Jan 2023). Available from: [www.data.go.kr/data/15085952/fileData.do](http://www.data.go.kr/data/15085952/fileData.do)

- [28] Song JY, Peck KR. A Debate on Public Health Responses to COVID-19: Focused Protection versus Sustained Suppression. *Journal of Korean Medical Science*. 2020;35(49):e433-0. doi: 10.3346/jkms.2020.35.e433.
- [29] Central Disaster and Safety Countermeasure Headquarters /Central Disaster and Safety Countermeasure Headquarters of the Republic of Korea. Rules and guidelines for distancing in daily life to control coronavirus disease 2019 in Korea: 3rd version, announced on July 3, 2020. *Journal of Educational Evaluation for Health Professions*. 2020;17(20).
- [30] [dataset] Korea Disease Control and Prevention Agency. Infectious disease portal. 2023. (accessed at Jan 2023). Available from: [https://www.mohw.go.kr/react/al/sal0301vw.jsp?PAR\\_MENU\\_ID=04&MENU\\_ID=0403&page=1&CONT\\_SEQ=366125](https://www.mohw.go.kr/react/al/sal0301vw.jsp?PAR_MENU_ID=04&MENU_ID=0403&page=1&CONT_SEQ=366125)
- [31] [dataset] Animal And Plant quarantine agency. Korea Animal Health Integrated System. 2023. (accessed at Jan 2023). Available from: <https://home.kahis.go.kr/home/lkntscrinfo/selectLkntsOccrncList.do>
- [32] [dataset] Ministry of Agriculture, Food and Rural Affairs. Regional Livestock Farming Status. (accessed at Jan 2023). Available from: <https://uni.agrix.go.kr/docs7/biOlap/fixType.do?reportId=report17>
- [33] Campbell F, Strang C, Ferguson N, Cori A, Jombart T. When are pathogen genome sequences informative of transmission events? *PLOS Pathogens*. 2018;14(2):e1006885. doi: 10.1371/journal.ppat.1006885.
- [34] Lau EHY, Nishiura H, Cowling B, Ip DKM, Wu J. Scarlet Fever Outbreak, Hong Kong, 2011. *Emerging Infectious Disease*. 2012;18(10):1700. doi: 10.3201/eid1810.120062.
- [35] Vink MA, Bootsma MCJ, Wallinga J. Serial Intervals of Respiratory Infectious Diseases: A Systematic Review and Analysis. *American Journal of Epidemiology*. 2014;180(9):865-75. doi: 10.1093/aje/kwad082.
- [36] Dritsakis N, Klazoglou P. Forecasting Unemployment Rates in USA using Box-Jenkins Methodology. *International Journal of Economics and Financial Issues*. 2018;8(1):9-20.
- [37] R Core Team. R: A language and environment for statistical computing. R Foundation for Statistical Computing, Vienna, Austria. 2020. <https://www.r-project.org/>
- [38] Hyndman RJ, Khandakar Y. Automatic Time Series Forecasting: The forecast Package for R. *Journal of Statistical Software*. 2008;27(3):1 - 22. doi: 10.18637/jss.v027.i03.
- [39] Shi HJ, Kim NY, Eom SA, Kim-Jeon MD, Oh SS, Moon BS, et al. Effects of Non-Pharmacological Interventions on Respiratory Viruses Other Than SARS-CoV-2: Analysis of Laboratory Surveillance and Literature Review From 2018 to 2021. *J Korean Med Sci*. 2022;37(21). doi: 10.3346/jkms.2022.37.e172.
- [40] Yum S, Hong K, Sohn S, Kim J, Chun BC. Trends in Viral Respiratory Infections During COVID-19 Pandemic, South Korea. *Emerging Infectious Disease*. 2021;27(6):1685. doi: 10.3201/eid2706.210135.
- [41] Li ZJ, Yu LJ, Zhang HY, Shan CX, Lu QB, Zhang XA, et al. Broad Impacts of Coronavirus Disease 2019 (COVID-19) Pandemic on Acute Respiratory Infections in China: An Observational Study. *Clinical Infectious Diseases*. 2021;75(1):e1054-e62. doi: 10.1093/cid/ciab942.

- [42] Fricke LM, Glöckner S, Dreier M, Lange B. Impact of non-pharmaceutical interventions targeted at COVID-19 pandemic on influenza burden - a systematic review. *Journal of Infection*. 2021;82(1):1-35. doi: 10.1016/j.jinf.2020.11.039.
- [43] Feng L, Zhang T, Wang Q, Xie Y, Peng Z, Zheng J, et al. Impact of COVID-19 outbreaks and interventions on influenza in China and the United States. *Nature Communications*. 2021;12(1):3249. doi: 10.1038/s41467-021-23440-1.
- [44] Park SH. Resurgence of Mumps in Korea. *Infect Chemother*. 2015;47(1):1-11. doi: 10.3947/ic.2015.47.1.1.
- [45] Cilloni L, Fu H, Vesga JF, Dowdy D, Pretorius C, Ahmedov S, et al. The potential impact of the COVID-19 pandemic on the tuberculosis epidemic a modelling analysis. *eClinicalMedicine*. 2020;28. doi: 10.1016/j.eclinm.2020.100603.
- [46] Jeong D, Kang HY, Kim J, Lee H, Yoo BN, Kim HS, Choi H. Cohort Profile: Korean Tuberculosis and Post-Tuberculosis Cohort Constructed by Linking the Korean National Tuberculosis Surveillance System and National Health Information Database. *J Prev Med Public Health*. 2022;55(3):253-262. doi: 10.3961/jpmph.21.635.
- [47] Kim SK, Choi J, Park BY. Trends in gastrointestinal infections before and during non-pharmaceutical interventions in Korea in comparison with the United States. *Epidemiology and Health*. 2022;44:e2022011. doi: 10.4178/epih.e2022011.
- [48] Lee HW, Ji SW, Lee Y, Kim HJ, Song WJ. Recent reasons for the decline in Hanwoo (Korean native cattle) prices and outlook. (in Korean). Korea Rural Economic Institute; 2022.
- [49] Yoon H, Moon O-K, Lee S-H, Lee W-C, Her M, Jeong W, et al. Epidemiology of brucellosis among cattle in Korea from 2001 to 2011. *J Vet Sci*. 2014;15(4):537-43. doi: 10.4142/jvs.2014.15.4.537.
- [50] Ministry of Agriculture, Food and Rural Affairs. Guidelines for Livestock Epidemic Prevention and Control, 2022. 2022.

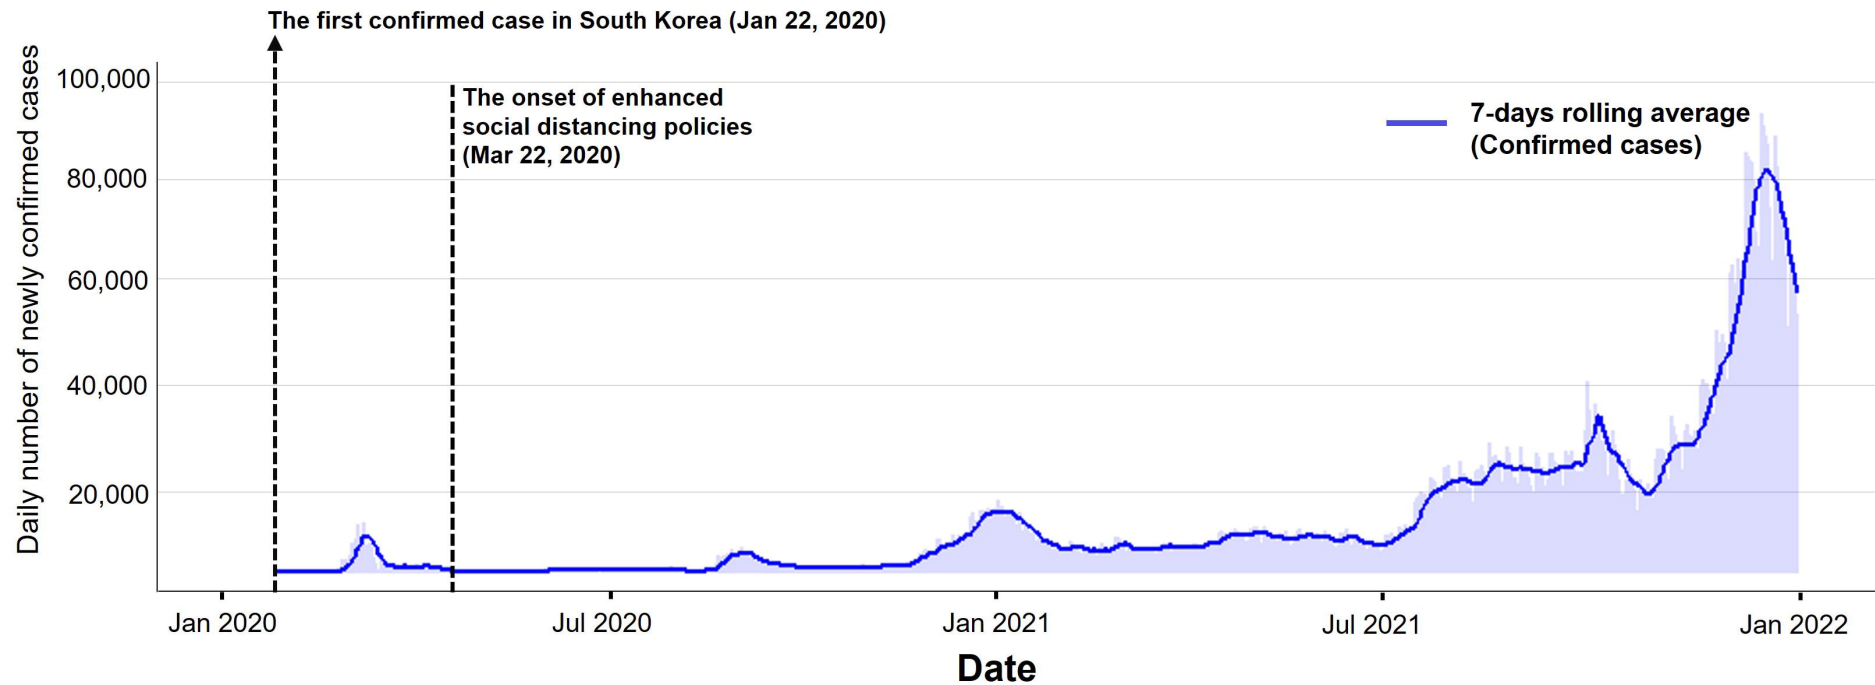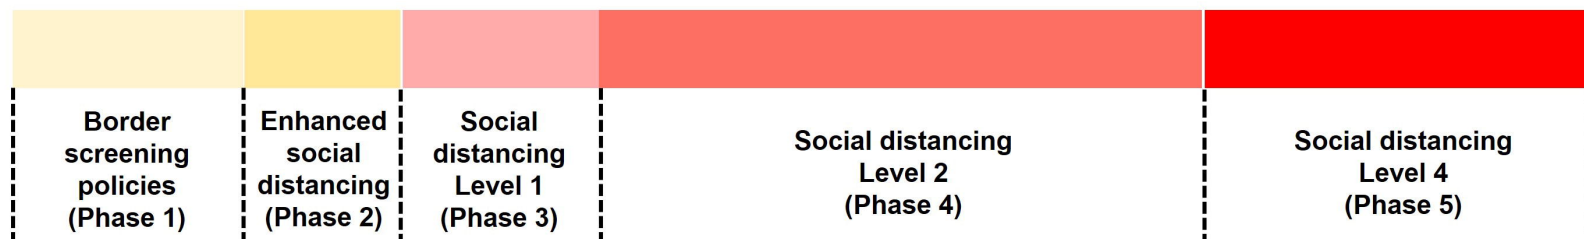

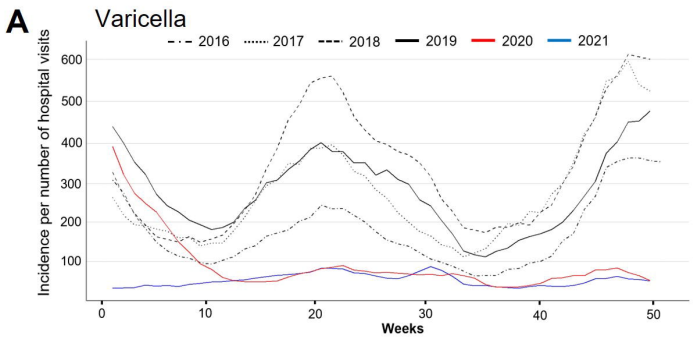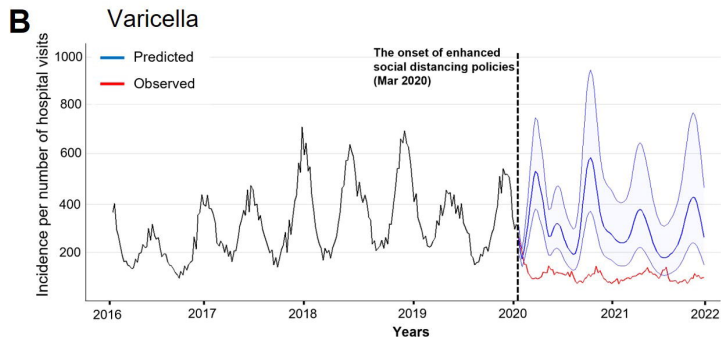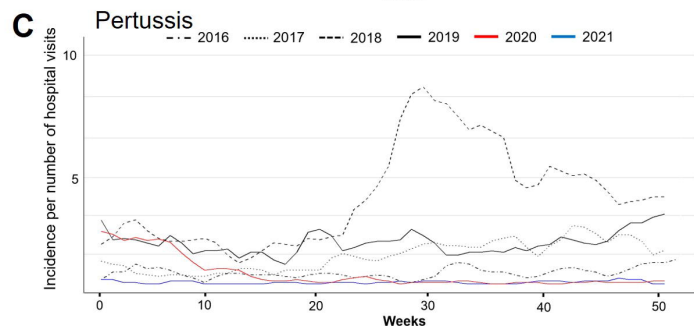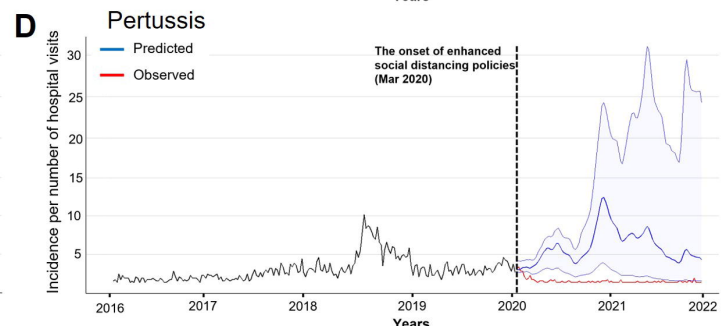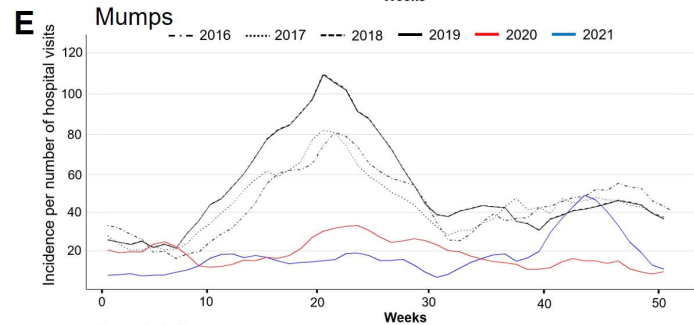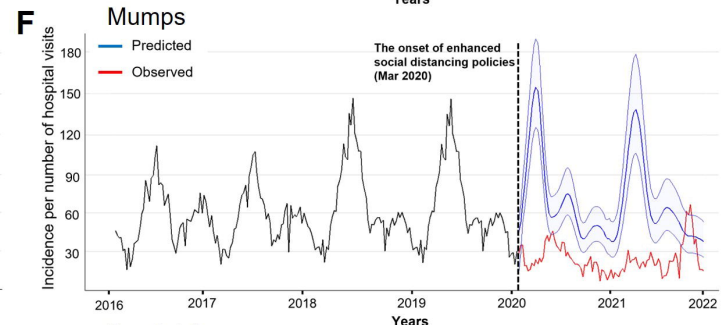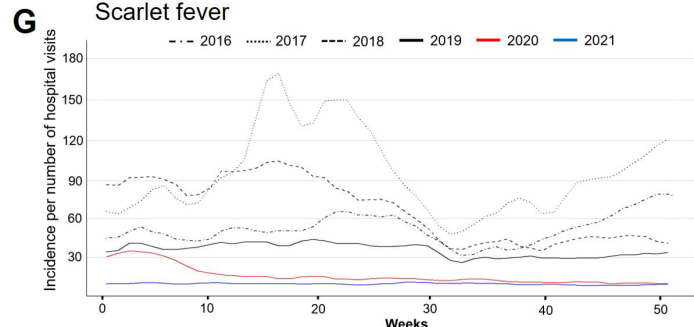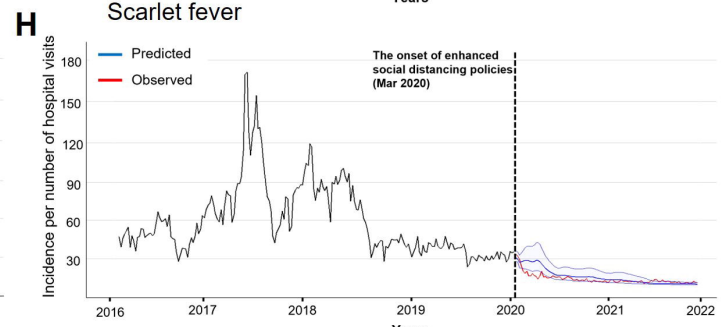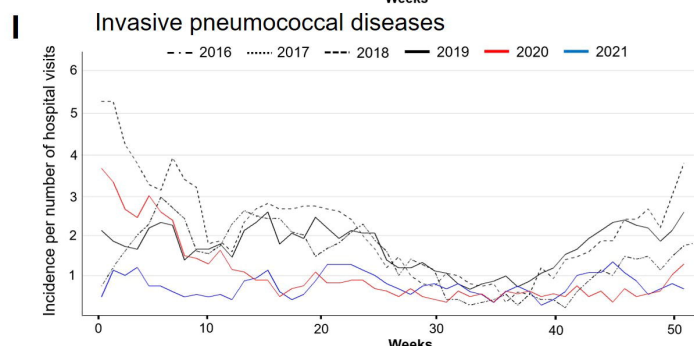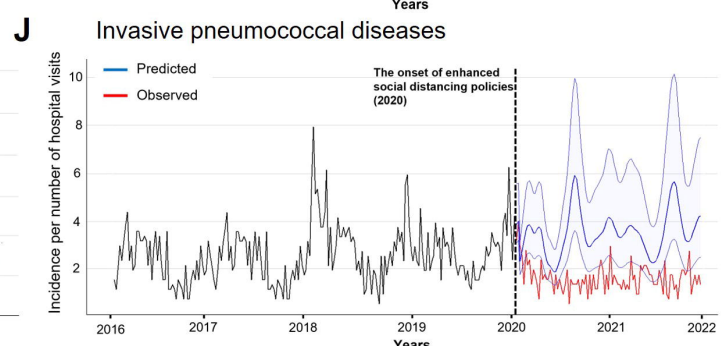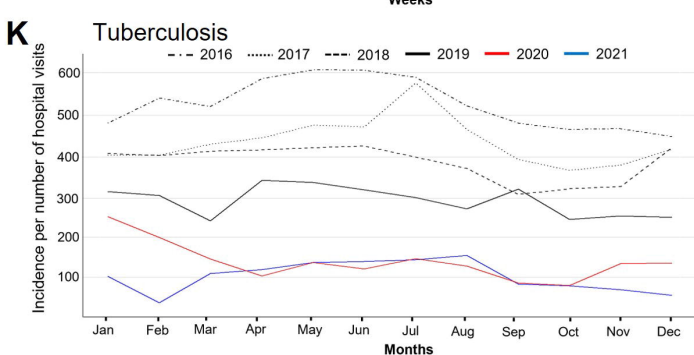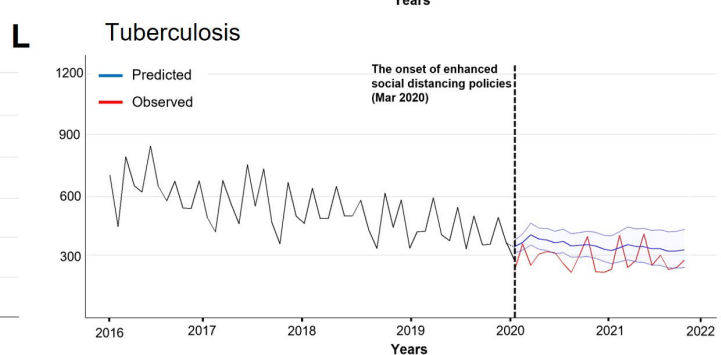



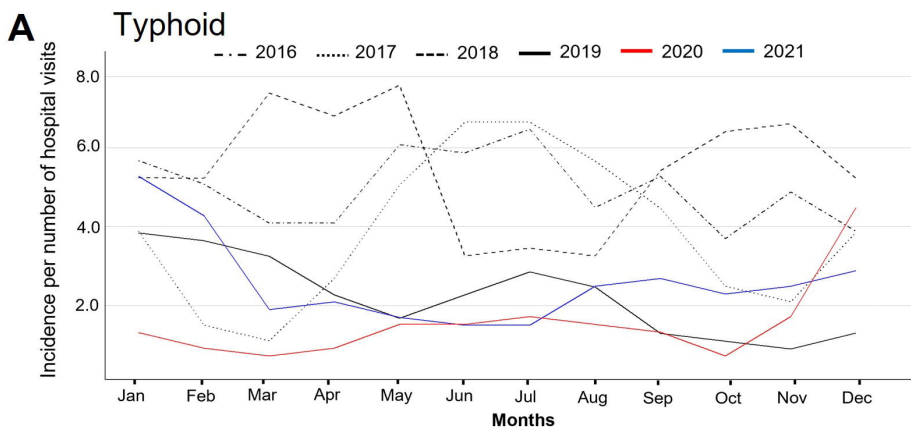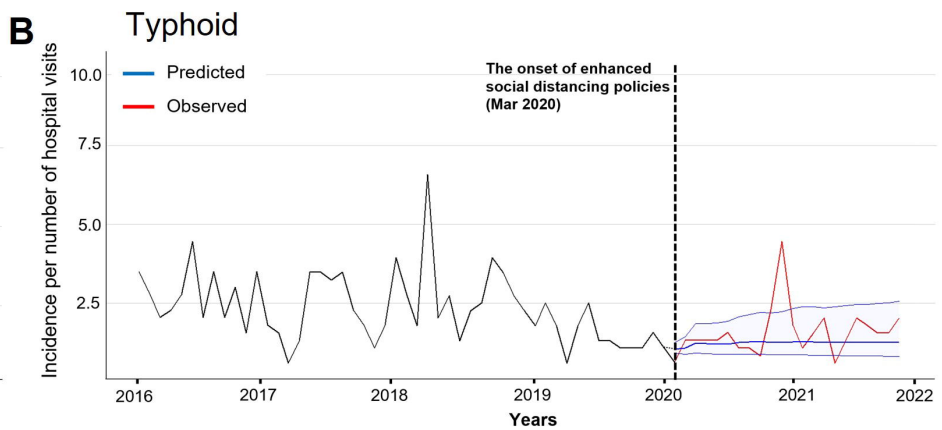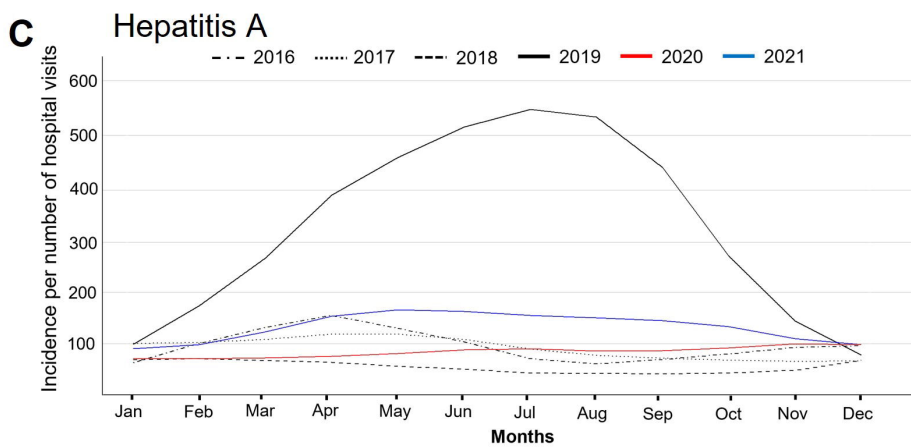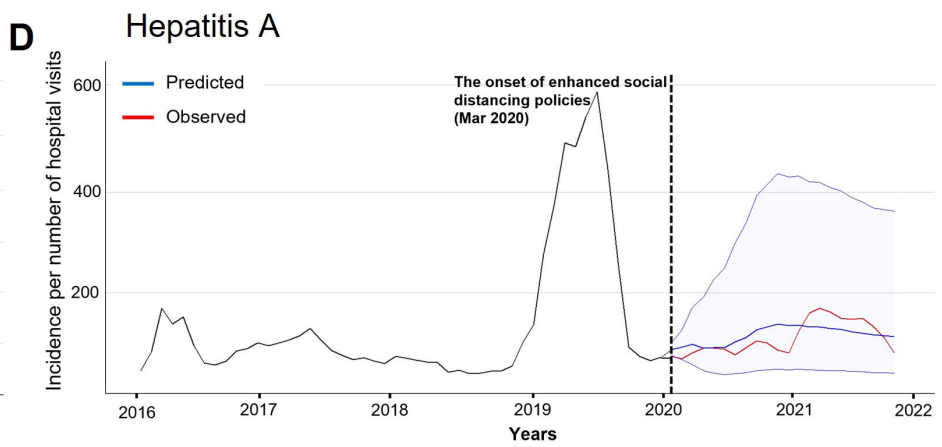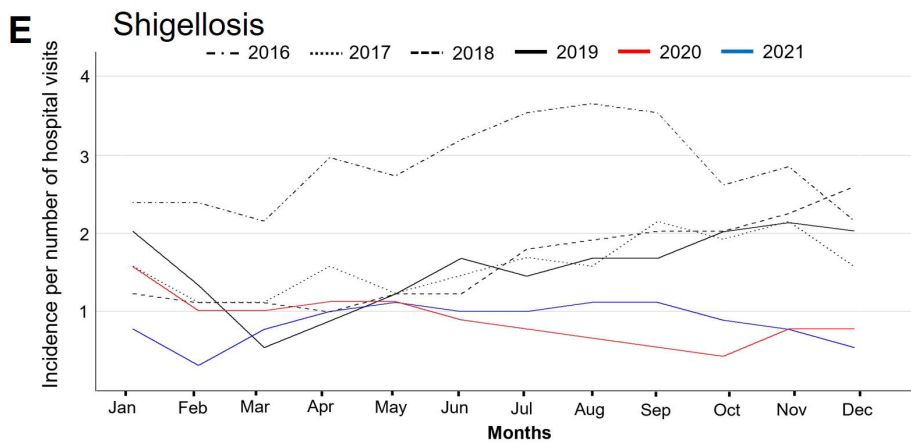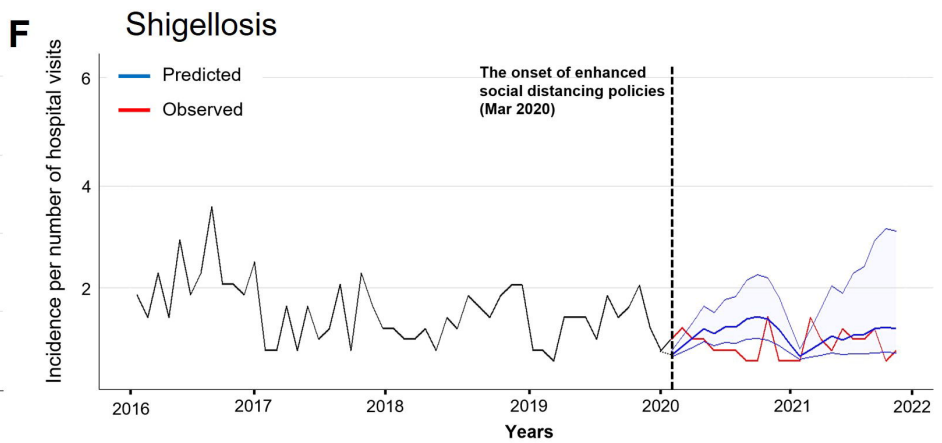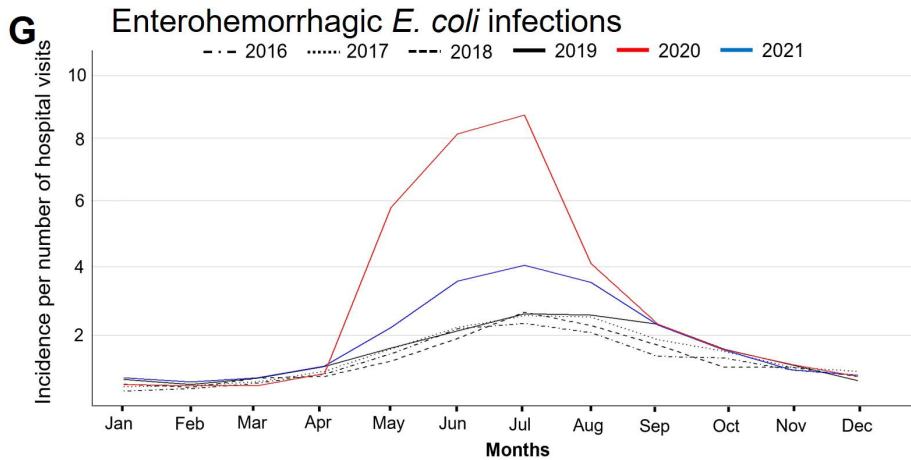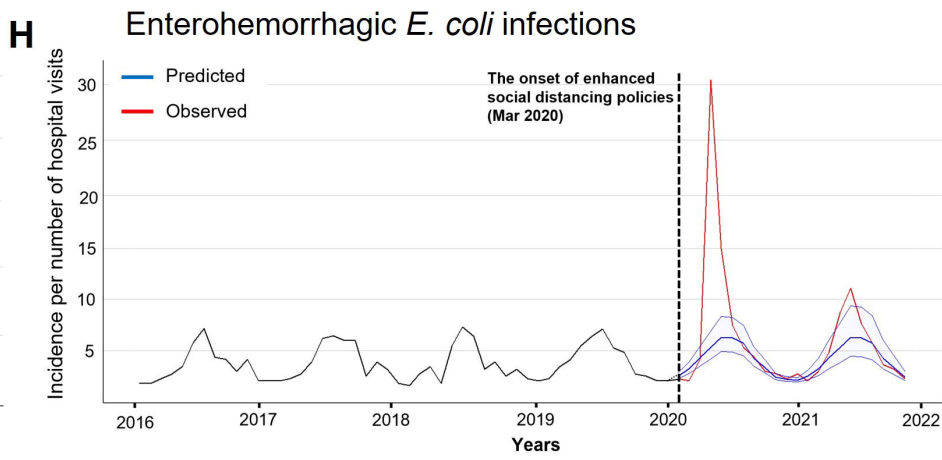

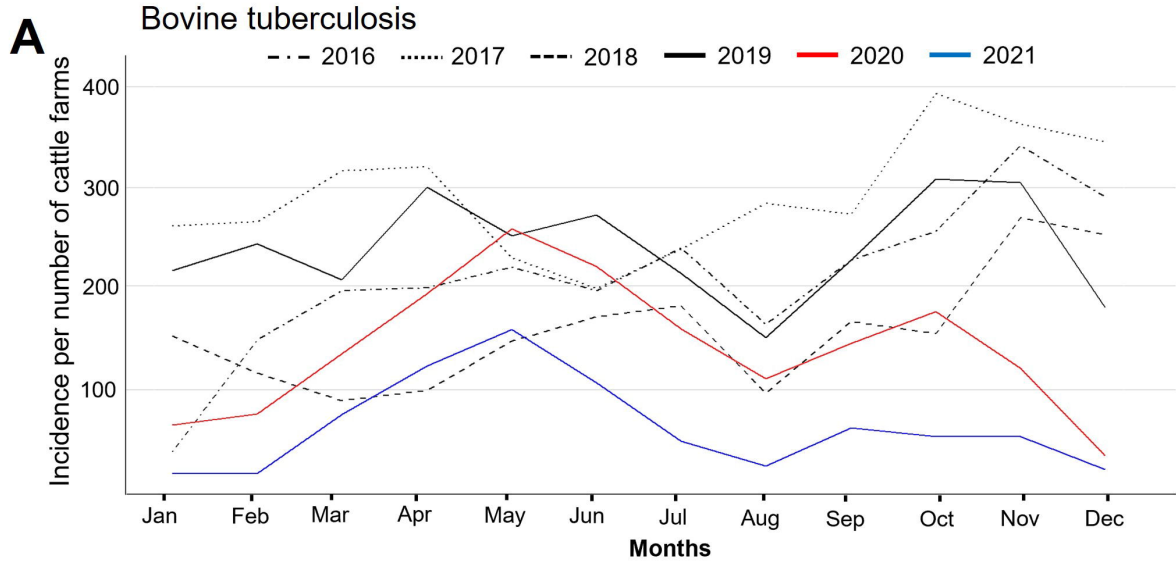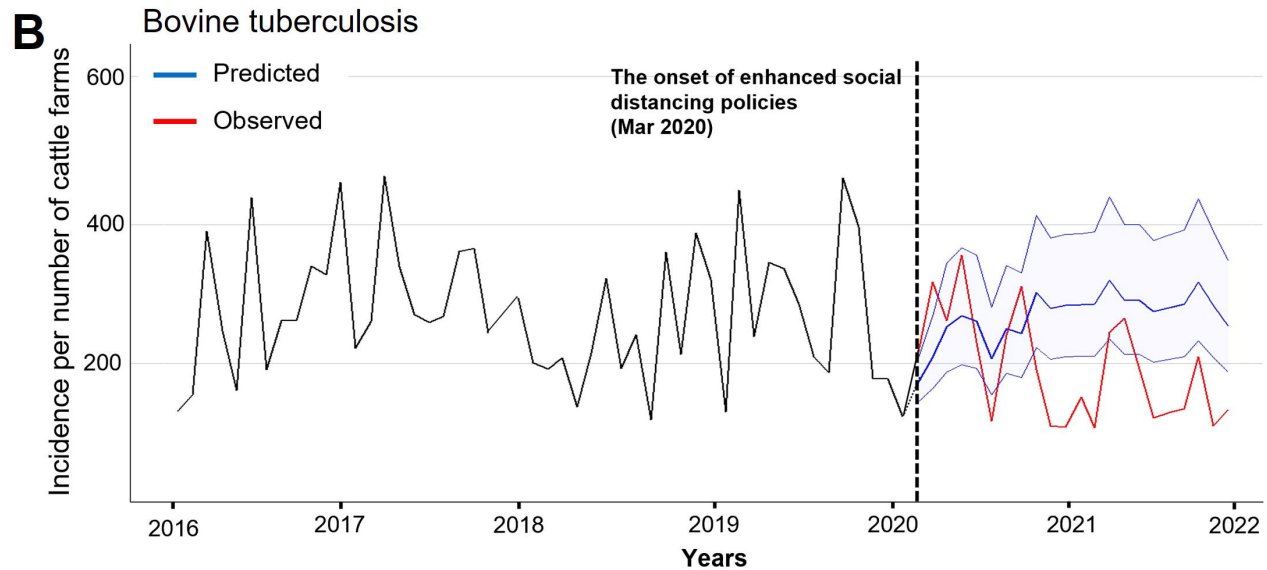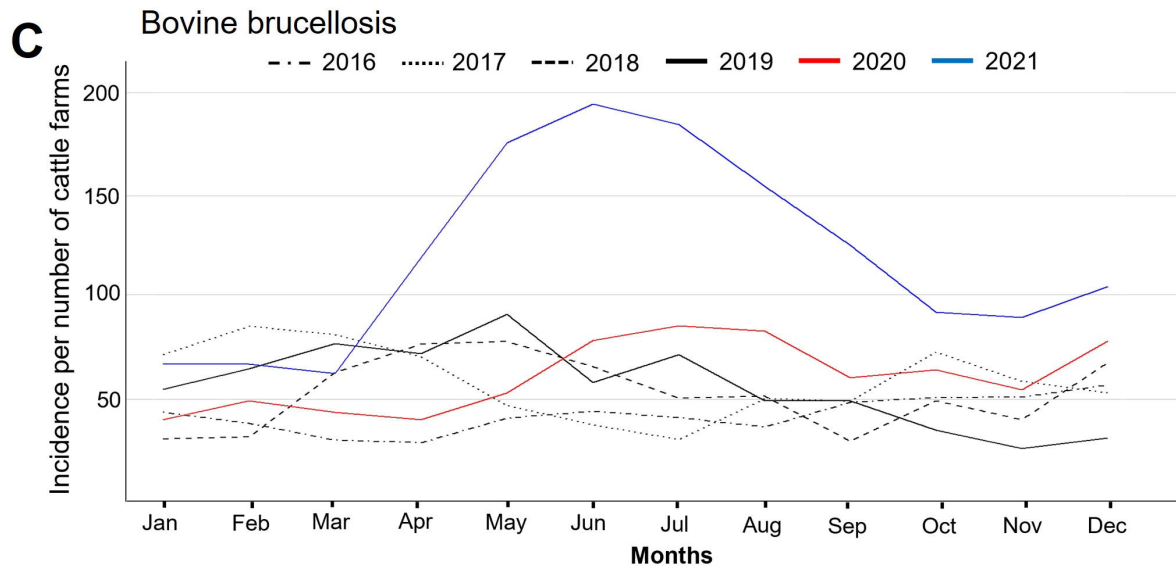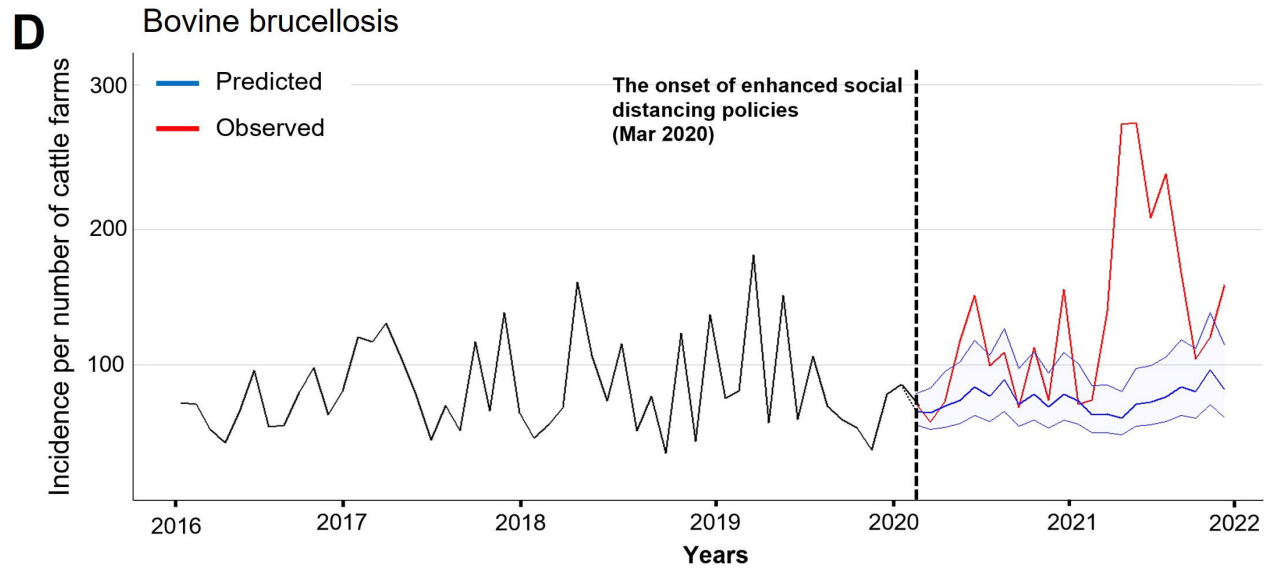

Source: https://medrxiv.org/content/10.1101/2023.10.16.23297064v1.full.pdf
